# Supplementary material for: SARS-CoV-2 infection disrupts CNS energy metabolism and immune homeostasis in African green monkeys
Source: Research Square preprint supplement (doi:10.21203/rs.3.rs-7134258/v1), 2025-08-05
Supplement: Supplementary file 1 [file 27ee1ceda5b5f323c1c93bb5.pdf]

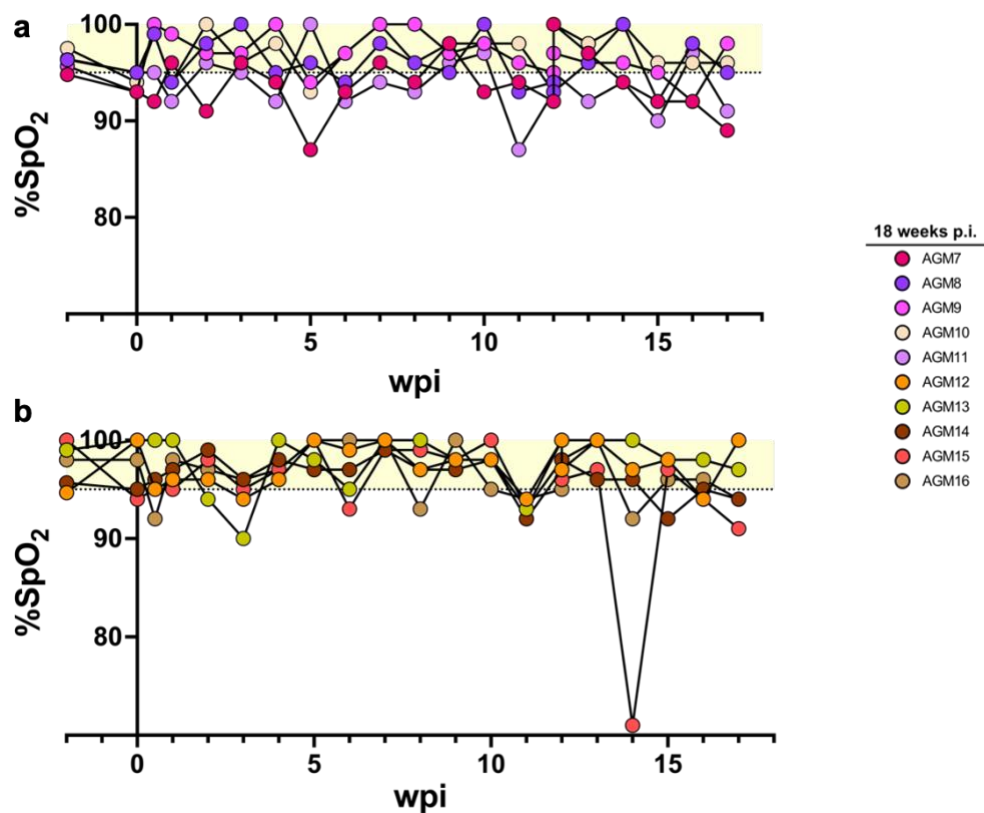

**Supplementary Data Figure 5. Peripheral oxygen saturation  $\text{SpO}_2$  levels over the study period.**  $\text{SpO}_2$  values for animals in the 18-wpi group are shown across the study duration, displayed in two graphs for clarity (**a**, **b**). Yellow shading denotes the physiological  $\text{SpO}_2$  range. Most animals maintained normal  $\text{SpO}_2$  levels throughout the study, with the exception of AGM15, which exhibited transient dyspnea and a drop in  $\text{SpO}_2$  at 14 wpi. Sample size: 18-wpi,  $n = 10$  biologically independent animals. Source data are provided as a Source Data file. Abbreviations:  **$\text{SpO}_2$**  – oxygen saturation.
