# Supplementary material for: SARS-CoV-2 infection disrupts CNS energy metabolism and immune homeostasis in African green monkeys
Source: Research Square preprint supplement (doi:10.21203/rs.3.rs-7134258/v1), 2025-08-05
Supplement: Supplementary file 3 [file 48c0d357cb16867c5b545481.pdf]

| Score | Observations                                                                                                                                                                                                          | Animal ID                          |
|-------|-----------------------------------------------------------------------------------------------------------------------------------------------------------------------------------------------------------------------|------------------------------------|
| 1     | <13% of BVs with astrocyte accumulation and <16% associated with microglia. <21% of tissue with hypertrophic microglia, <22% of tissue with hypertrophic astrocytes. Maximum nodule size <5000 $\mu\text{m}^2$ .      | AGM12                              |
| 2     | <13% of BVs with astrocyte accumulation and <16% associated with microglia. <21% of tissue with hypertrophic microglia, <22% of tissue with hypertrophic astrocytes. Maximum nodule size $\geq 5000\mu\text{m}^2$ .   | AGM14,<br>AGM8,<br>AGM6            |
| 3     | <13% of BVs with astrocyte accumulation and <16% associated with microglia. 21-26% of tissue with hypertrophic microglia, <22% of tissue with hypertrophic astrocytes. Maximum nodule size $\geq 5000\mu\text{m}^2$ . | AGM10                              |
| 4     | >13% of BVs with astrocyte accumulation and >16% associated with microglia. >21% of tissue with hypertrophic microglia, <22% of tissue with hypertrophic astrocytes. Maximum nodule size $\geq 5000\mu\text{m}^2$ .   | AGM11,<br>AGM9,<br>AGM5            |
| 5     | >13% of BVs with astrocyte accumulation and >16% associated with microglia. >21% of tissue with hypertrophic microglia, >22% of tissue with hypertrophic astrocytes. Maximum nodule size $\geq 5000\mu\text{m}^2$ .   | AGM7,<br>AGM13,<br>AGM15,<br>AGM16 |

**Supplementary Table 2. Subjective neuroinflammation scoring.** Iba1, GFAP, and HLA-DR IHC observations were used to assign a composite neuroinflammation score to each animal. Values were used to investigate correlations between neuroinflammation and behavioral assessments. Abbreviations: **BV** – blood vessel
