# Supplementary material for: SARS-CoV-2 infection disrupts CNS energy metabolism and immune homeostasis in African green monkeys
Source: Research Square preprint supplement (doi:10.21203/rs.3.rs-7134258/v1), 2025-08-05
Supplement: Supplementary file 4 [file 4aa7761f3051efc71507213c.pdf]

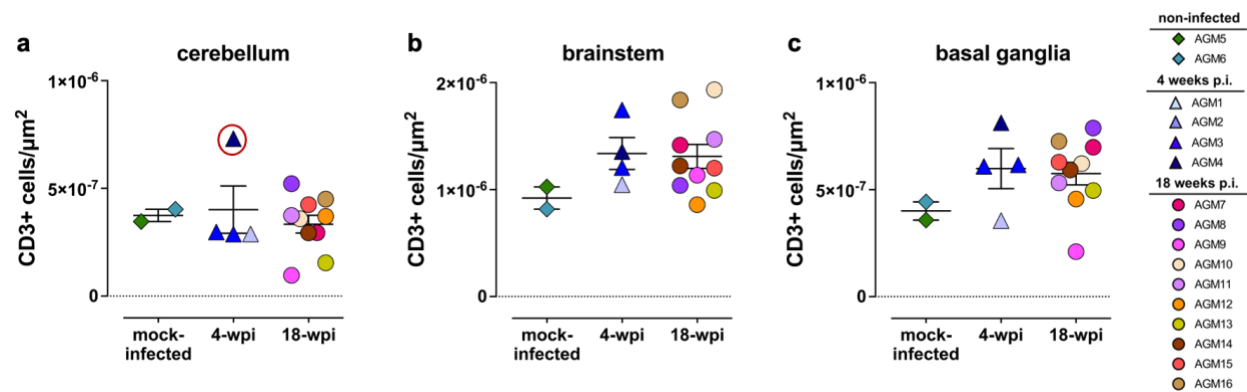

**Supplementary Data Figure 2. CD3+ T-cell infiltrate in deep brain structures following SARS-CoV2 infection.** CD3 IHC was performed to detect T-cell infiltration in deep brain structures. Quantification of CD3+ cells/ $\mu\text{m}^2$  revealed no statistically significant differences across groups. A modest increase in CD3+ cell frequency was observed in the brainstem (**b**) and basal ganglia (**c**) of infected animals compared to mock-infected controls. One statistical outlier was identified in the cerebellum (**a**) using the ROUT method. Exclusion of this data point did not yield statistically significant differences with either comparator group. Statistical analysis was performed using Welch's ANOVA. Data expressed as mean  $\pm$  SEM. Source data are provided as a Source Data file. Abbreviations: **wpi** – weeks post-infection.
