# Supplementary material for: SARS-CoV-2 infection disrupts CNS energy metabolism and immune homeostasis in African green monkeys
Source: Research Square preprint supplement (doi:10.21203/rs.3.rs-7134258/v1), 2025-08-05
Supplement: Supplementary file 5 [file 6e083ea29d9419871b26d066.pdf]

| Score | Observations                                                                                                                             | Animal ID                   |
|-------|------------------------------------------------------------------------------------------------------------------------------------------|-----------------------------|
| 1     | Acute bleeds or densely packed RBCs account for <40% of all microhemorrhages, with <20 total events and involvement of $\leq 2$ regions. | AGM14                       |
| 2     | Acute bleeds account for 40-60% of all microhemorrhages, with 10-85 total events and involvement of 2-5 regions.                         | AGM5, AGM6                  |
| 3     | Acute bleeds account for 60-75% of all microhemorrhages, with 10-85 total events and involvement of 2-7 regions.                         | AGM13,<br>AGM10, AGM8       |
| 4     | Acute bleeds account for $\geq 75\%$ of all microhemorrhages, with 10-85 total events and involvement of 2-7 regions.                    | AGM7, AGM9,<br>AGM15, AGM16 |
| 5     | Acute bleeds account for $\geq 75\%$ of all microhemorrhages, with >85 total events and involvement of 6-7 regions.                      | AGM11, AGM12                |

**Supplementary Table 1. Subjective microhemorrhage scoring.** Microhemorrhage frequency and RBC density findings from H&E-stained tissues were used to assign a composite microhemorrhage burden score for each animal. Values were used to examine correlations with behavioral assessments.
