# Supplementary material for: SARS-CoV-2 infection disrupts CNS energy metabolism and immune homeostasis in African green monkeys
Source: Research Square preprint supplement (doi:10.21203/rs.3.rs-7134258/v1), 2025-08-05
Supplement: Supplementary file 6 [file 7b842afdb9e376e72306ab44.pdf]

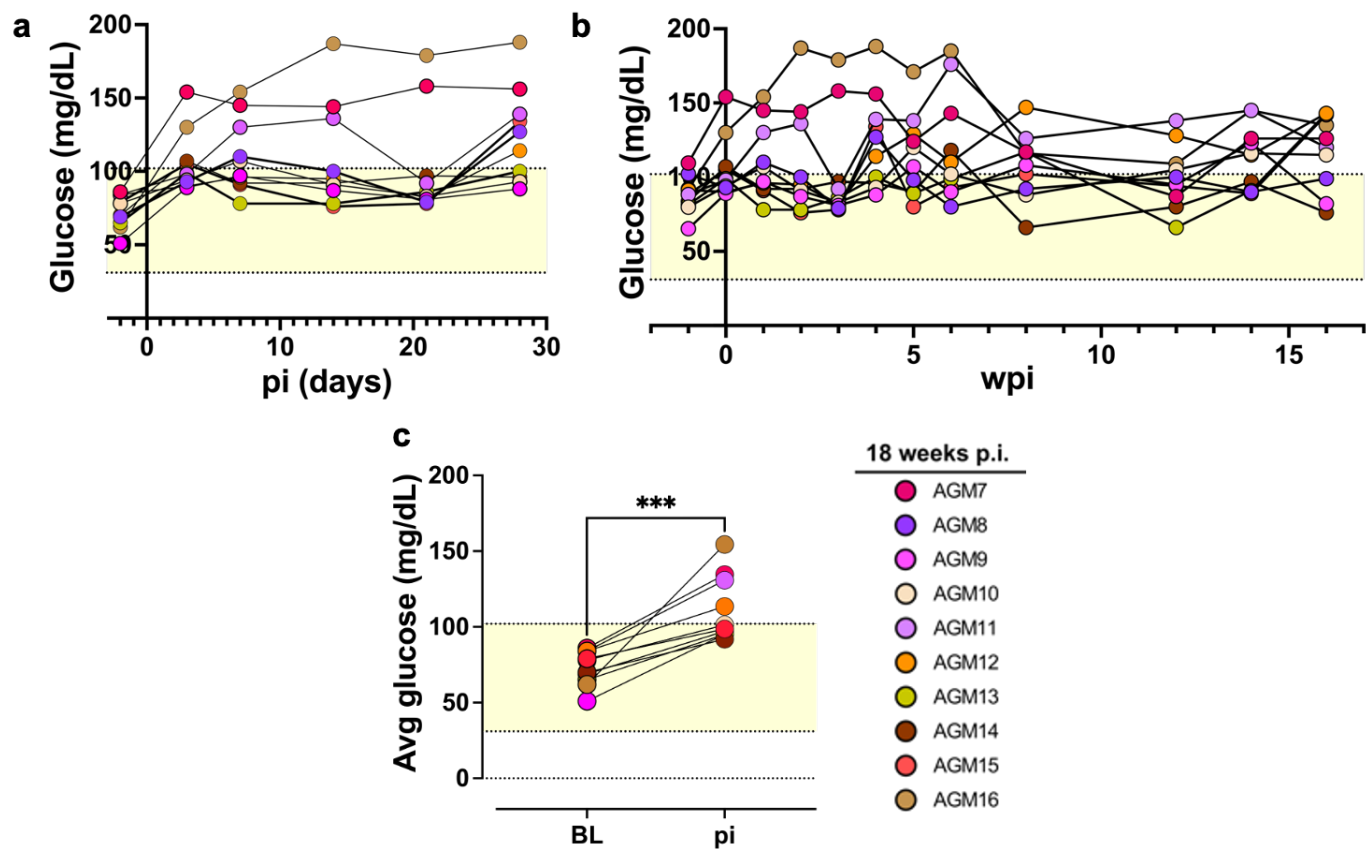

**Supplementary Data Figure 7. Altered glucose homeostasis following SARS-CoV-2 infection.** Fasting blood glucose levels were measured longitudinally in the 18-wpi group. Several animals exhibited elevated glucose during the first 4 wpi, with notable elevations at 28 days (**a**). Compared to baseline values, five animals maintained glucose levels above the physiological range throughout the study (**b**). Group-level analysis showed a significant increase in average glucose levels post-infection compared to baseline (**c**), \*\*\* $p = 0.0003$  (95% CI: 22.91 to 53.96). The physiological range for glucose in African green monkeys is 31–102 mg/dL. Sample size: 18-wpi,  $n = 10$  biologically independent animals. Source data are provided as a Source Data file. Abbreviations: **pi** –post-infection.
