# Supplementary material for: SARS-CoV-2 infection disrupts CNS energy metabolism and immune homeostasis in African green monkeys
Source: Research Square preprint supplement (doi:10.21203/rs.3.rs-7134258/v1), 2025-08-05
Supplement: Supplementary file 7 [file 858b5094e47b7c9a310cc165.pdf]

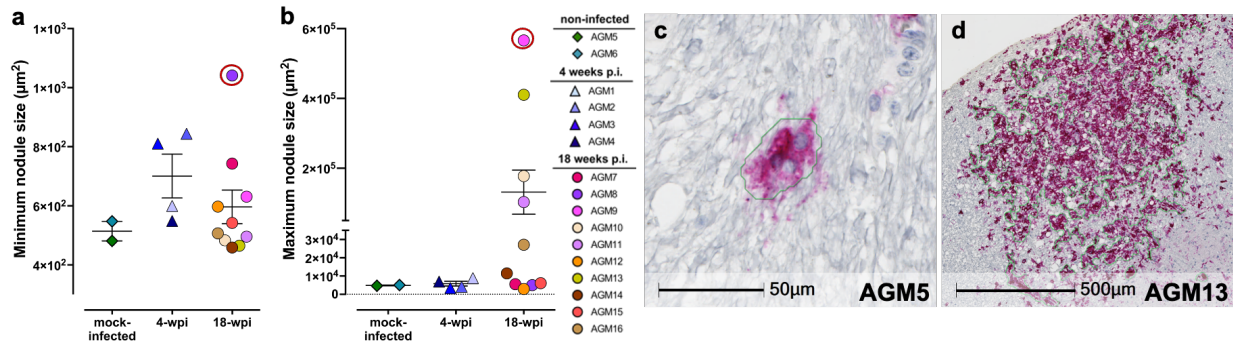

**Supplementary Data Figure 4: Increased size of HLA-DR<sup>+</sup> microglial nodules in SARS-CoV-2-infected animals.** Microglial nodules, defined by HLA-DR immunoreactivity, were generally larger in infected animals compared to mock-infected controls. Nodules were identified using a trained machine learning algorithm (HALO) that delineated each lesion and calculated nodule area ( $\mu\text{m}^2$ ), normalized to the number of nodules per tissue. Minimum nodule size per animal was greater in both 4-week and 18-week post-infection (wpi) groups relative to controls (**a**, **c**), while the largest maximum nodule sizes were observed in the brainstem of 18-wpi animals, particularly in AGM9, AGM13, AGM10, and AGM11 (**b**, **d**). Sample sizes: mock-infected controls,  $n = 2$ ; 4-wpi,  $n = 4$ ; 18-wpi,  $n = 10$  biologically independent animals. Statistics were performed using Welch's ANOVA. Data expressed as mean  $\pm$  SEM. Source data are provided as a Source Data file. Abbreviations: **wpi** – weeks post-infection. Scale bars = 50  $\mu\text{m}$ , 500  $\mu\text{m}$ .
