# Supplementary material for: SARS-CoV-2 infection disrupts CNS energy metabolism and immune homeostasis in African green monkeys
Source: Research Square preprint supplement (doi:10.21203/rs.3.rs-7134258/v1), 2025-08-05
Supplement: Supplementary file 8 [file 892e8e0793a64a855e7cc6d9.pdf]

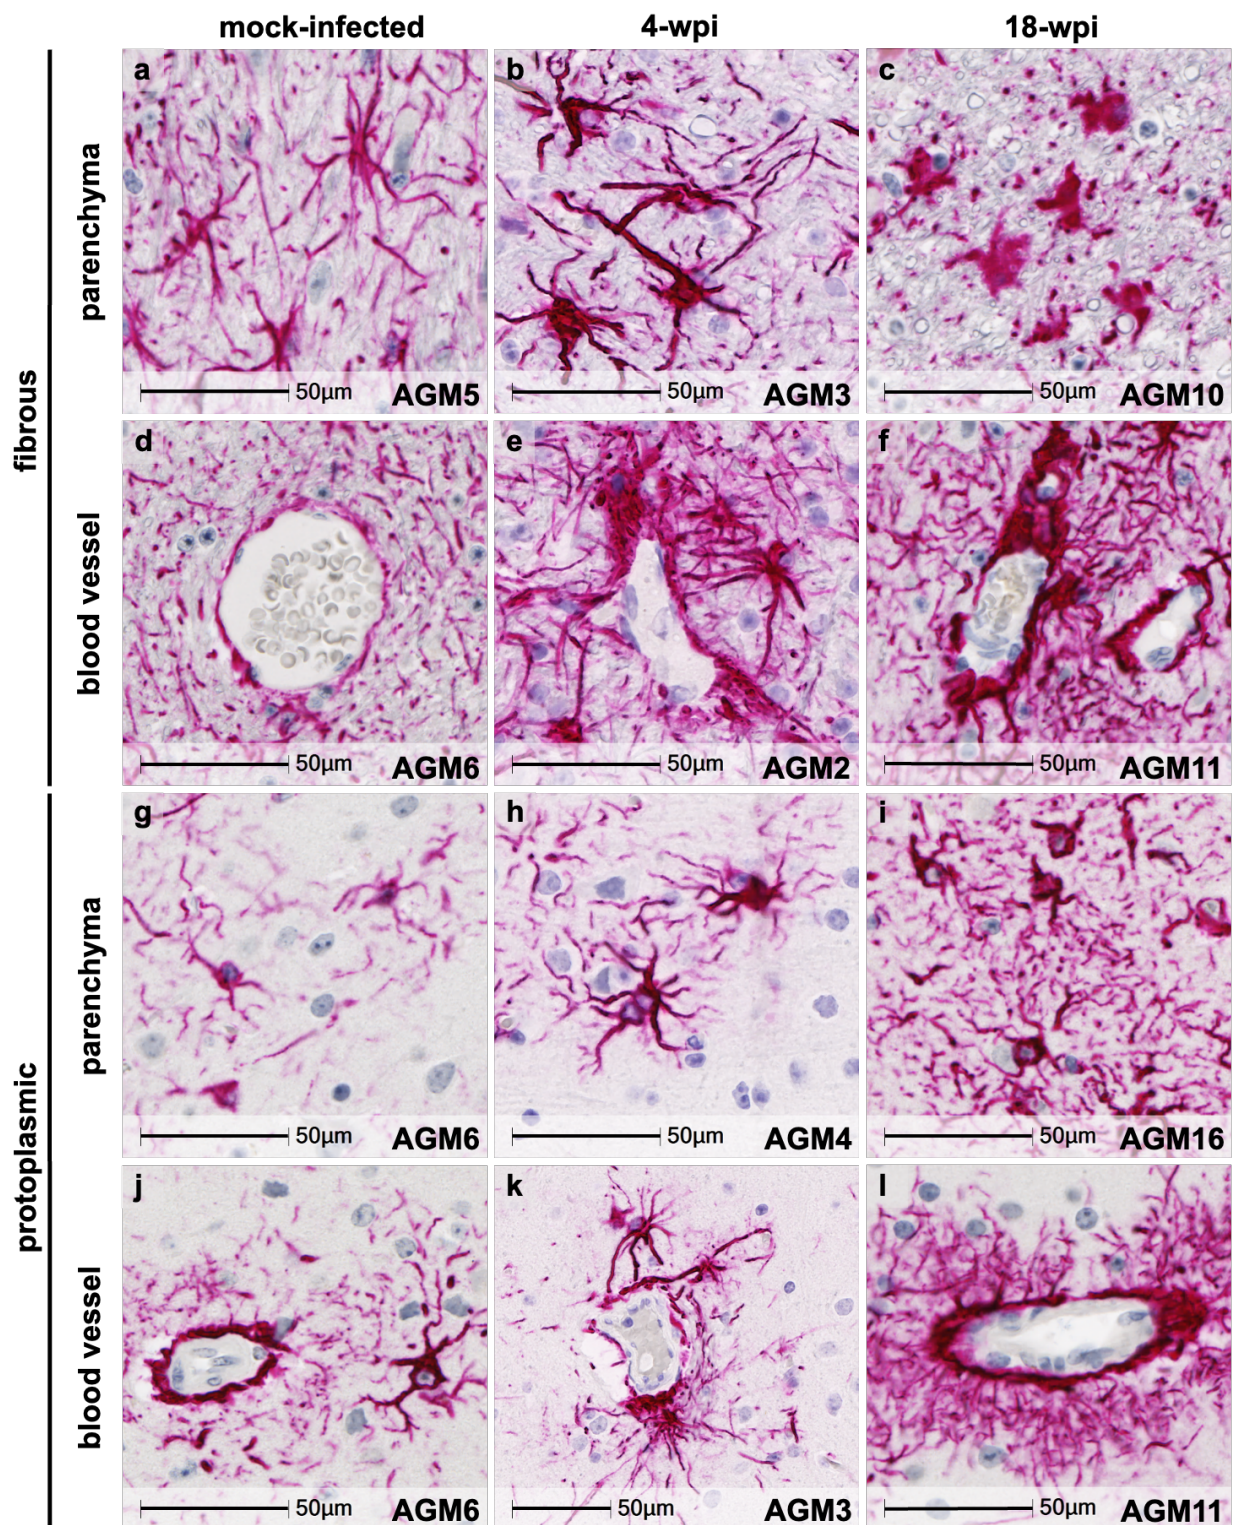

**Supplementary Data Figure 3: Protoplasmic and fibrous astrocytes.** Representative images of GFAP immunostaining show fibrous astrocytes in white matter (**a - f**) and protoplasmic

astrocytes in gray matter regions (**g - I**) in brain of mock- and SARS-CoV-2-infected animals. IHC staining was performed once on all brain regions. Abbreviations: **wpi** – weeks post-infection. Scale bars = 50  $\mu$ m.
