# Supplementary material for: SARS-CoV-2 infection disrupts CNS energy metabolism and immune homeostasis in African green monkeys
Source: Research Square preprint supplement (doi:10.21203/rs.3.rs-7134258/v1), 2025-08-05
Supplement: Supplementary file 9 [file c679a8f922a68118f463100b.pdf]

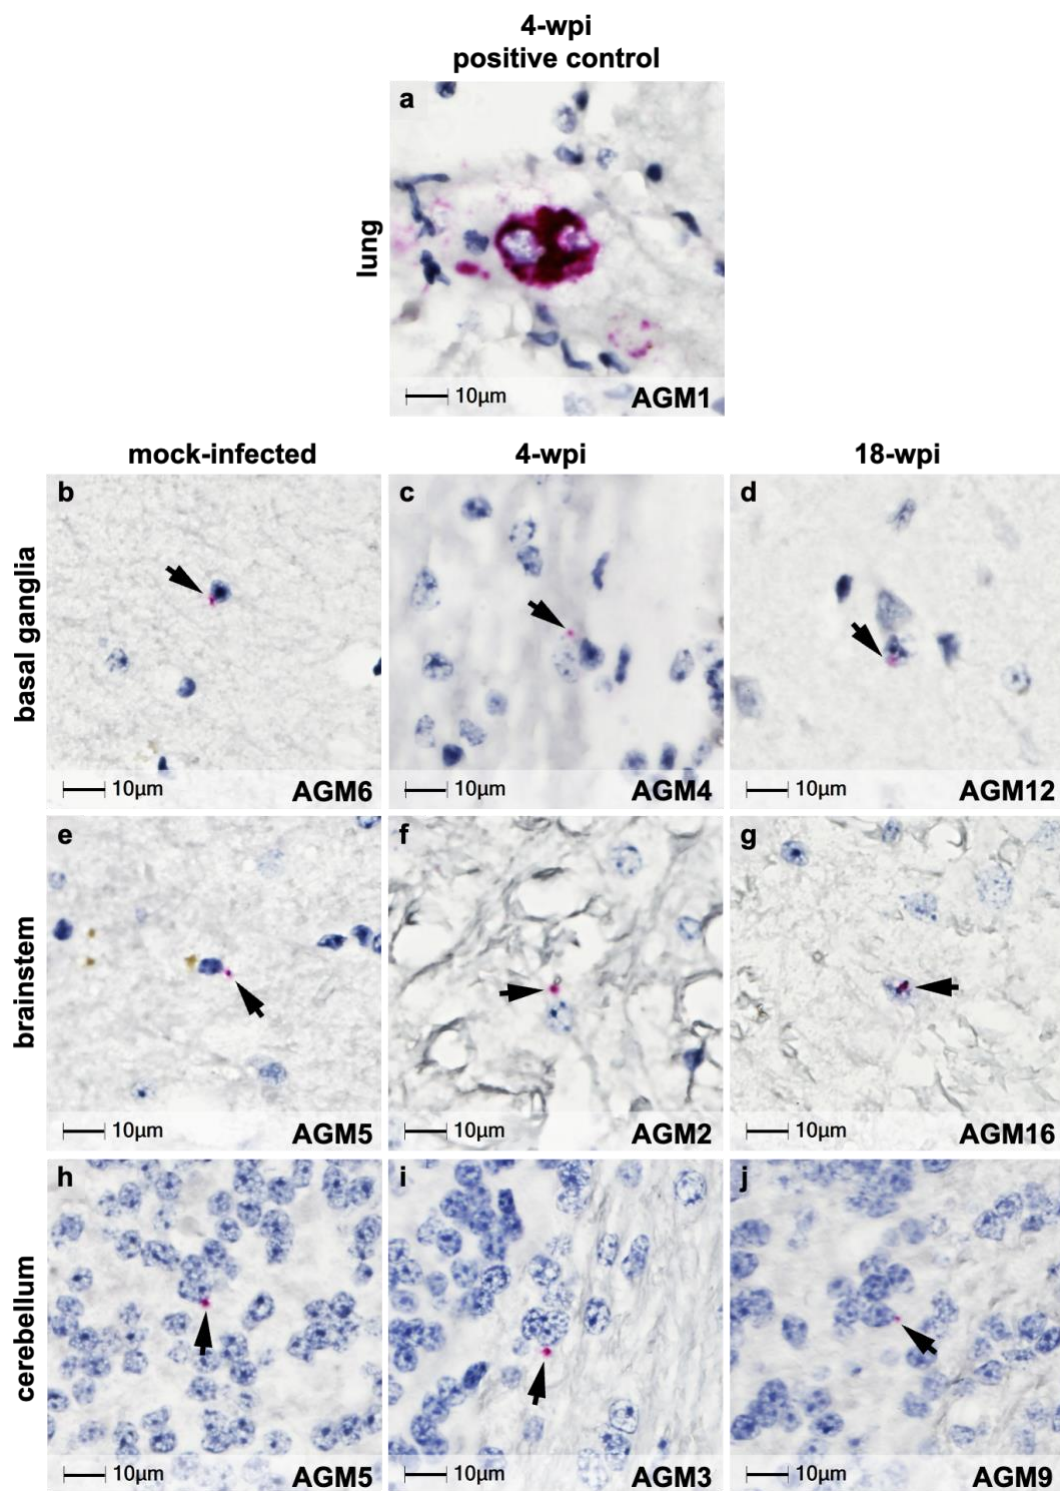

**Supplemental Data Figure 9. Absence of detectable SARS-CoV-2 spike RNA in the brain at 18 wpi.**

RNAscope in situ hybridization using a RED chromogen probe for SARS-CoV-2 spike RNA revealed no detectable viral RNA in brain tissue sections from animals at 18 wpi (**b-j**). A lung tissue section from a 4-wpi animal (AGM1) served as a positive control and demonstrated robust spike RNA signal (**a**).
