# Supplementary material for: SARS-CoV-2 infection disrupts CNS energy metabolism and immune homeostasis in African green monkeys
Source: Research Square preprint supplement (doi:10.21203/rs.3.rs-7134258/v1), 2025-08-05
Supplement: Supplementary file 10 [file efe65f1d07473afd0665584f.pdf]

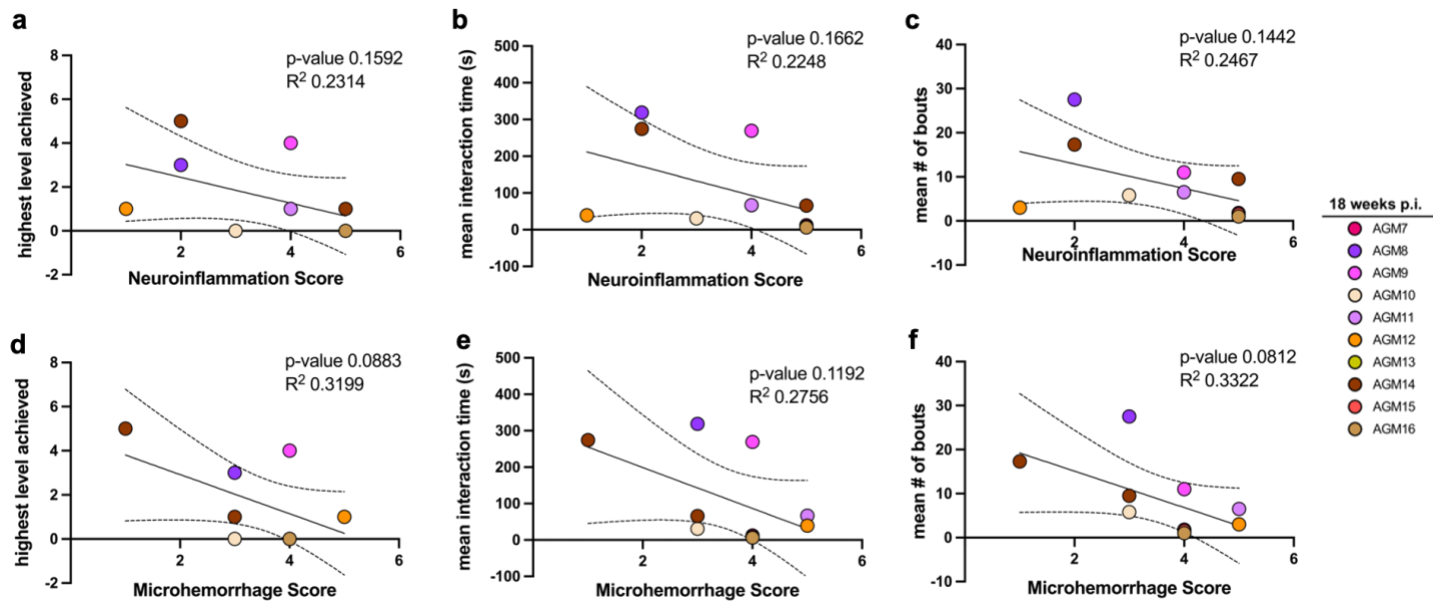

**Supplementary Data Figure 8. Associations between neuroinflammatory and microhemorrhage scores and puzzle task performance at 10–12 wpi.** Correlations between post-mortem composite neuroinflammation and microhemorrhage scores and behavioral performance in the puzzle test (conducted at 10–12 weeks post-infection) did not reach statistical significance. A trend was observed between higher neuroinflammation scores and reduced behavioral performance, including fewer levels achieved (**a**), shorter mean interaction time (**b**), and fewer interaction bouts (**c**). Similarly, higher microhemorrhage scores were associated with reduced task engagement, including fewer levels achieved (**d**), shorter mean interaction time (**e**), and fewer interaction bouts (**f**).
