# Supplementary material for: SARS-CoV-2 infection disrupts CNS energy metabolism and immune homeostasis in African green monkeys
Source: Research Square preprint supplement (doi:10.21203/rs.3.rs-7134258/v1), 2025-08-05
Supplement: Supplementary file 11 [file f3a68bc6f016d675bc9d5261.pdf]

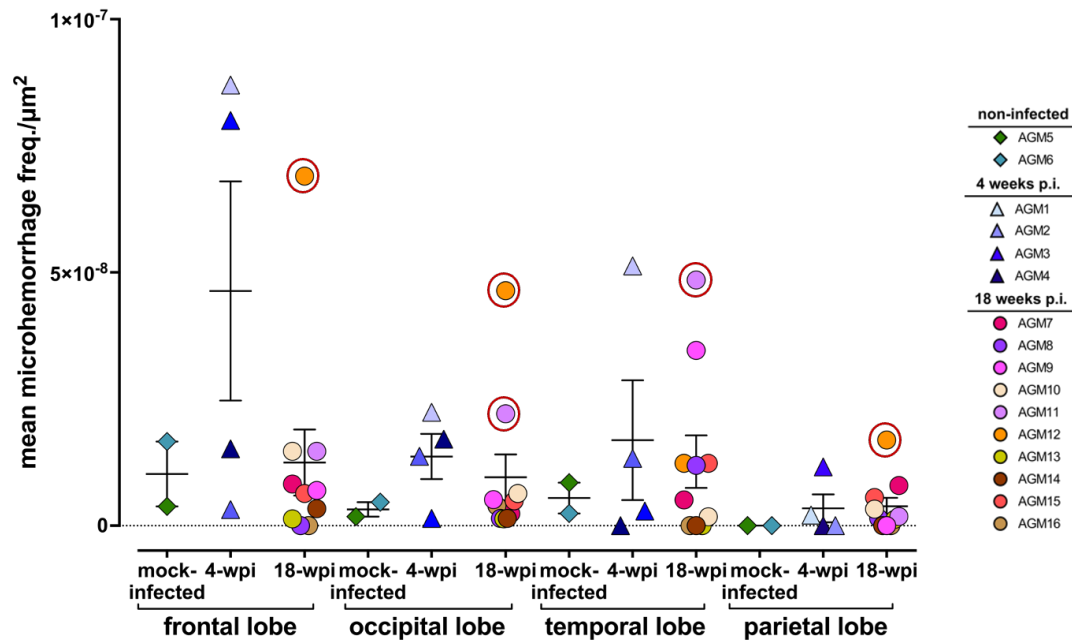

**Supplementary Data Figure 1. Quantification of microhemorrhage frequency in non-deep brain regions.** Graph shows the number of microhemorrhages per unit area ( $\mu\text{m}^2$ ) in brain regions outside the deep structures, with each point representing an individual animals. Microhemorrhage frequency increased at 4 wpi compared both mock-infected controls and animals at 18 wpi. A subset of 18-wpi animals exhibited persistently elevated microhemorrhage frequency (highlighted with red circles) and were identified as statistical outliers using the ROUT method. Sample sizes: mock-infected controls,  $n = 2$ ; 4-wpi,  $n = 4$ ; 18-wpi,  $n = 10$  biologically independent animals. Data are expressed as mean  $\pm$  SEM. Source data are provided as a Source Data file. Abbreviations: **wpi** – weeks post-infection.
